# Supplementary material
Source: publisher site journal article supplement (https://www.dovepress.com/article/447010)
Supplement: Supplementary file 1 [file get_supplementary_file.php]

**Supplemental file 1: Outcome definition(s)**

- All cases of thrombosis (arterial and venous) were defined using the International Statistical Classification of Diseases (ICD)10-CM code, chart documentation (i.e., Myocardial infarction (MI), ischemic stroke, pulmonary embolism, deep vein thrombosis) and/or radiological studies including ultrasound and computed tomography scans
- Acute kidney injury (AKI) was defined as a sudden decrease of renal function within 48 hours, defined by an increase in absolute SCr of at least 26.5 μmol/L (0.3 mg/dL) or by a percentage increase in SCr ≥ 50% (1.5× baseline value) during ICU stay (20)
- Acute liver injury was defined as alanine aminotransferase (ALT) exceeding three times the upper limit of normal or double in patients with elevated baseline ALT during the ICU stay.
- New-onset Afib. was defined as a new onset or a first detectable episode of atrial fibrillation (any type), whether symptomatic or not.
